# Supplementary material for: Replication Study: Discovery and preclinical validation of drug indications using compendia of public gene expression data
Source: eLife journal article supplement (doi:10.7554/elife.17044), 2017-01-16
Supplement: figures [file elife-17044-figures-v1.pdf]

---

## Figures and figure supplements

Replication Study: Discovery and preclinical validation of drug indications using compendia of public gene expression data

**Irawati Kandela and Fraser Aird**

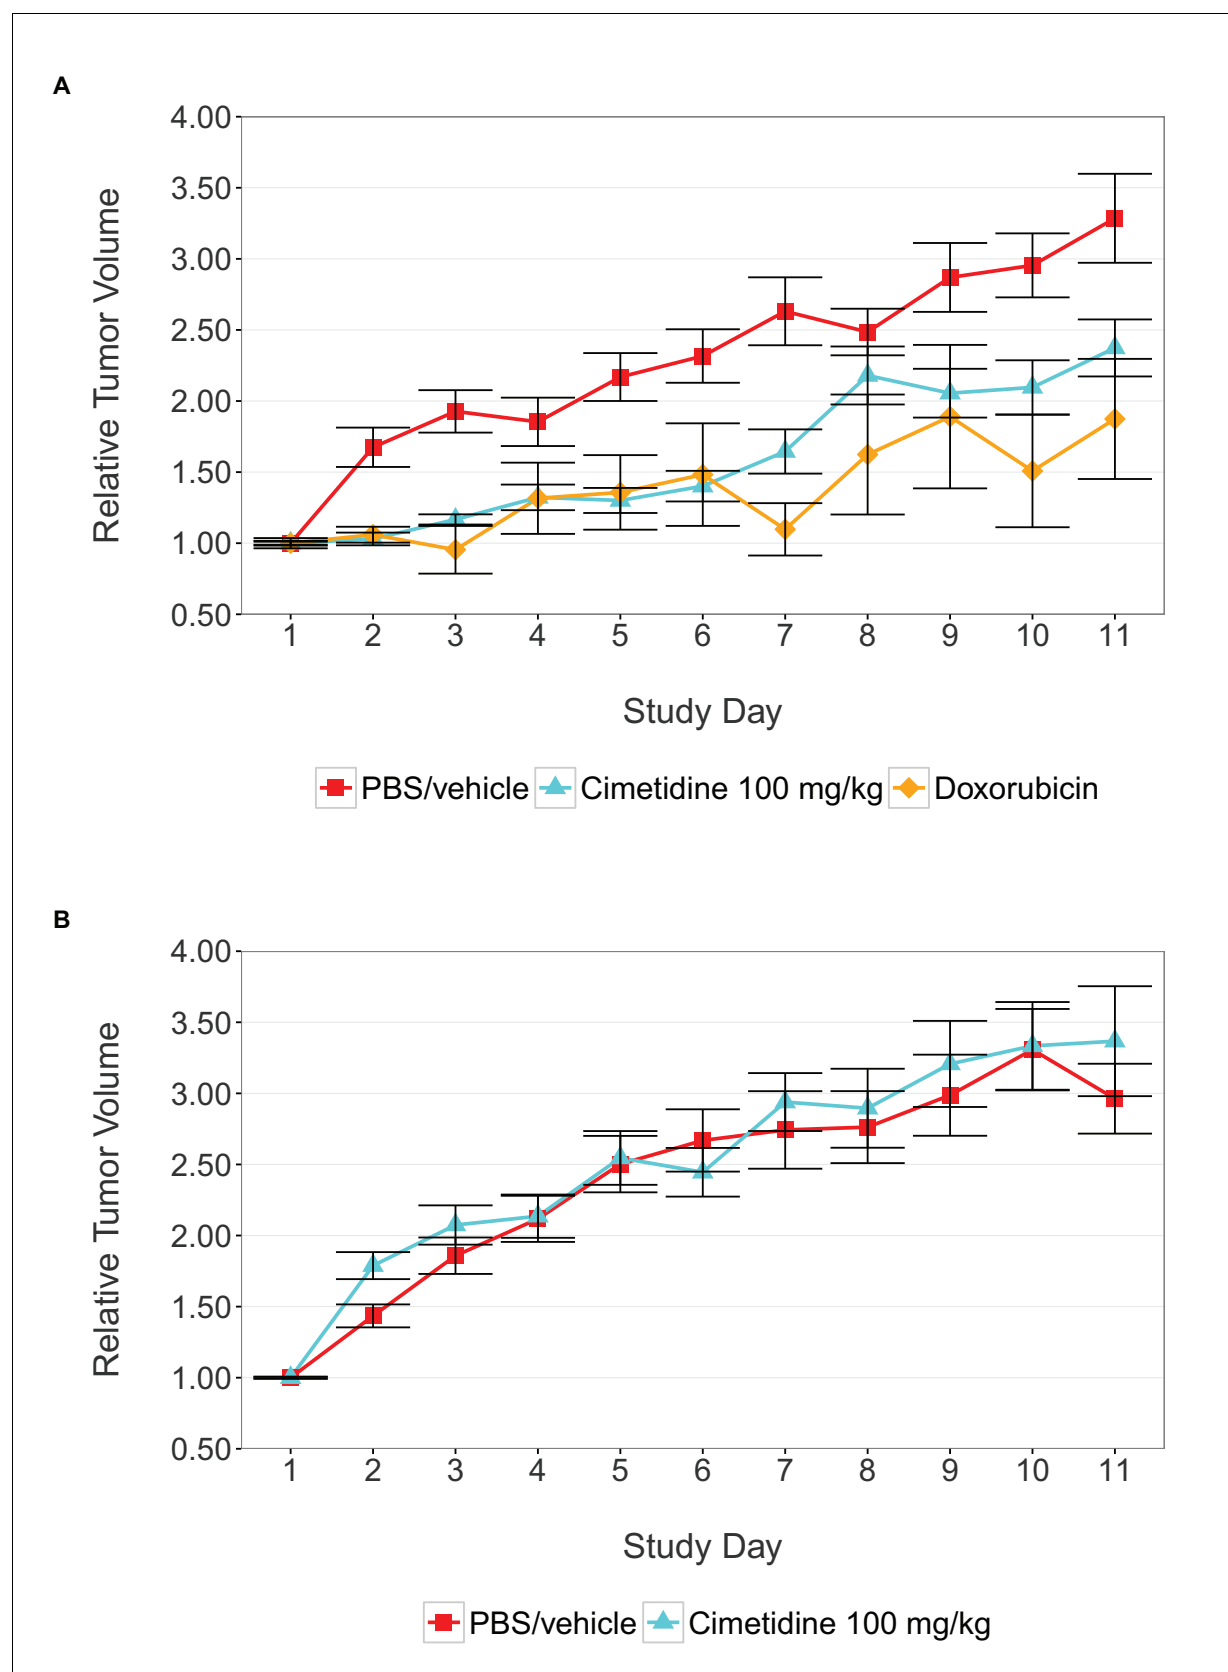

**Figure 1.** Tumor xenograft experiment testing efficacy of cimetidine in inhibiting the growth of tumors in SCID mice. Female SCID mice bearing subcutaneous A549 human lung adenocarcinomas (A) or ACHN renal cell carcinomas (B) were randomized into three treatment groups once tumors were palpable. Figure 1 continued on next page

## Figure 1 continued

reached a calculated volume of 100 mm<sup>3</sup>. Mice were intraperitoneally injected with 100 mg/kg cimetidine, vehicle (PBS), or 2 mg/kg doxorubicin. Tumor volumes were measured by caliper for the duration of the study. For each condition tumor volume was normalized relative to the average Day 1 values. Means reported and error bars represent s.e.m. Number of mice: (A) A549 tumors: n=14 (vehicle), n=13 (cimetidine), n=4 (doxorubicin) (B) ACHN tumors: n=15 (vehicle), n=15 (cimetidine). Two-tailed Welch's t-test on Day 11 relative volumes between vehicle or doxorubicin treated A549 tumors;  $t(6.73) = 2.68$ , uncorrected  $p=0.0325$  with a *priori* alpha level = 0.0167; (Bonferroni corrected  $p=0.0976$ ). Two-way ANOVA interaction between cell line (A549 or ACHN) and treatment (vehicle or cimetidine) on natural log transformed Day 11 relative volumes;  $F(1,53) = 3.88$ ,  $p=0.054$ . Pairwise contrast between A549 tumors treated with vehicle or cimetidine;  $t(53) = 2.16$ , uncorrected  $p=0.035$  with a *priori* alpha level = 0.0167; (Bonferroni corrected  $p=0.105$ ). Pairwise contrast between ACHN tumors treated with vehicle or cimetidine;  $t(53) = 0.58$ , uncorrected  $p=0.562$  with a *priori* alpha level = 0.0167; (Bonferroni corrected  $p>0.99$ ). Additional details for this experiment can be found at <https://osf.io/fh6gn/>.

DOI: [10.7554/eLife.17044.002](https://doi.org/10.7554/eLife.17044.002)

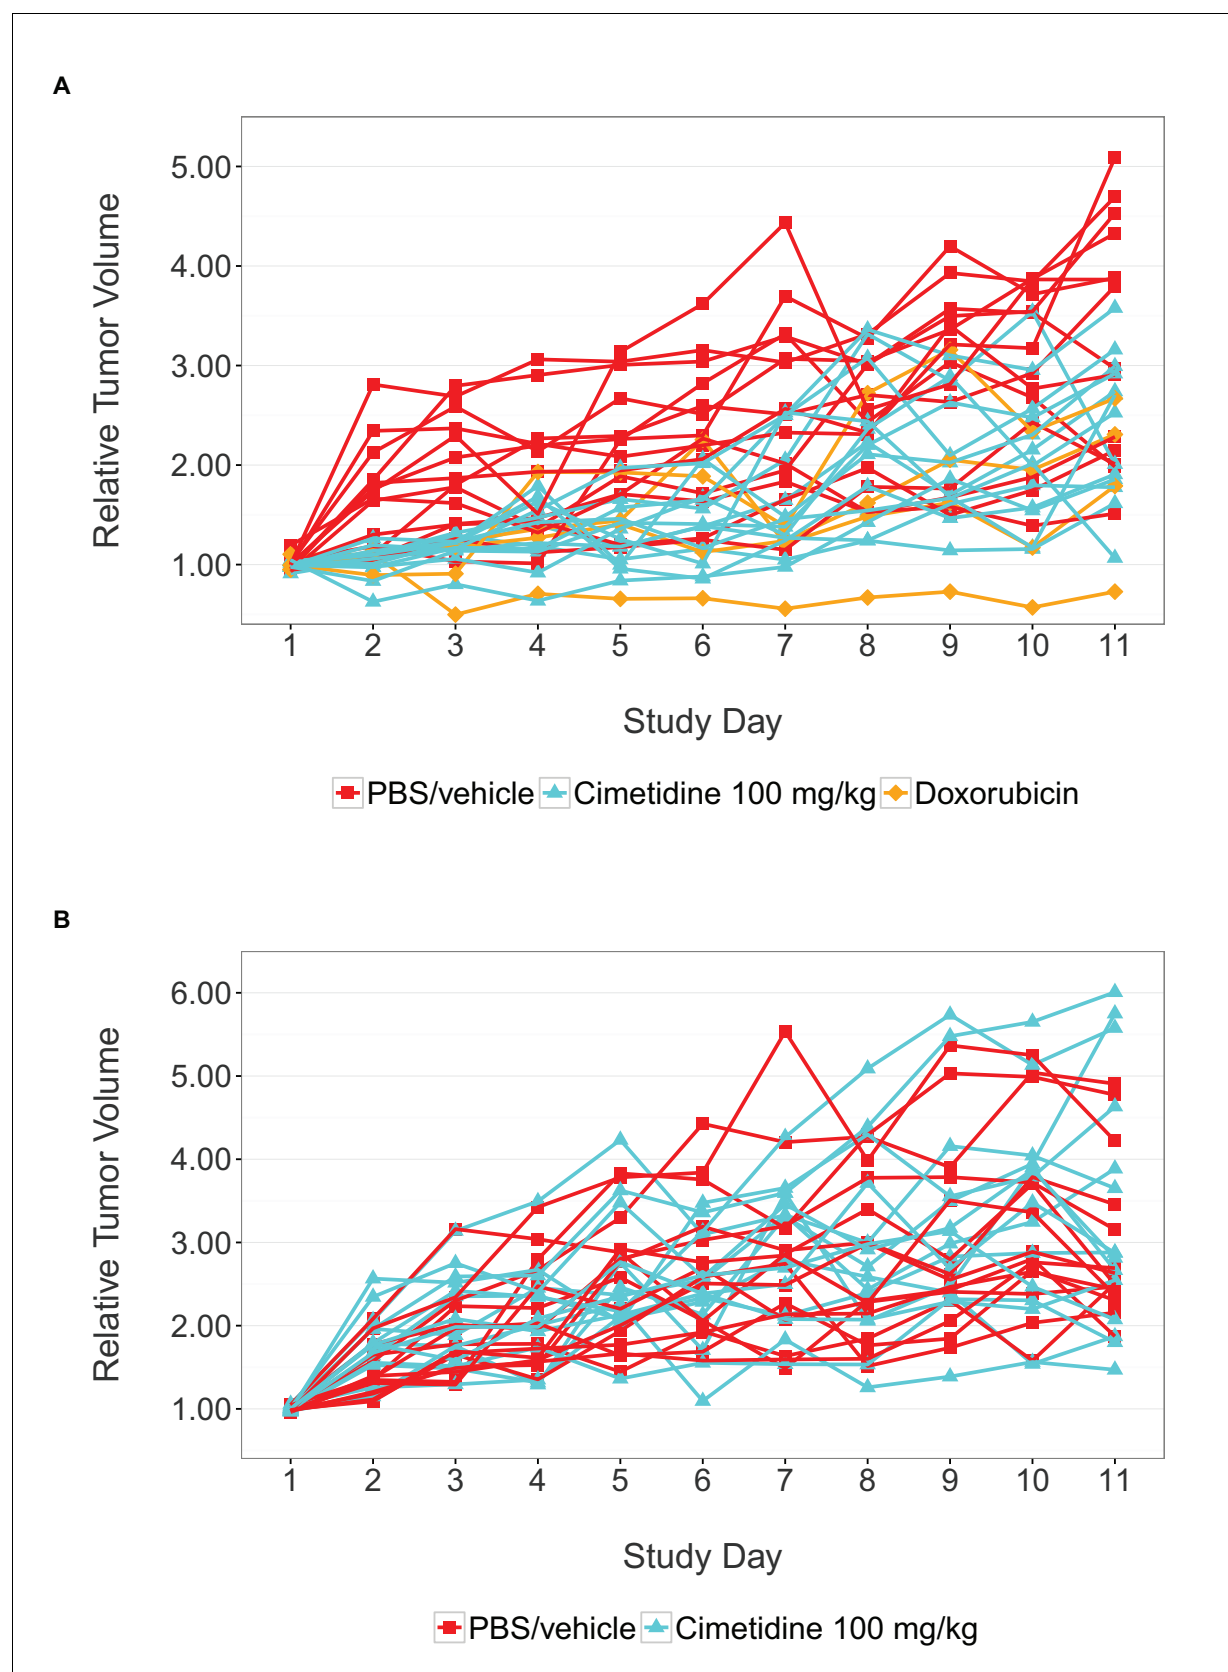

**Figure 1—figure supplement 1.** Individual tumor xenografts. This is the same experiment as in **Figure 1**, but with the data plotted for each animal rather than averages. Female SCID mice bearing subcutaneous A549 human lung adenocarcinomas (**A**) or ACHN renal cell carcinomas (**B**) were

*Figure 1—figure supplement 1 continued on next page*

*Figure 1—figure supplement 1 continued*

intraperitoneally injected with 100 mg/kg cimetidine, vehicle (PBS), or 2 mg/kg doxorubicin. For each condition tumor volume was normalized relative to the average Day 1 values. Number of mice: **(A)** A549 tumors: n=14 (vehicle), n=13 (cimetidine), n=4 (doxorubicin) **(B)** ACHN tumors: n=15 (vehicle), n=15 (cimetidine). Additional details for this experiment can be found at <https://osf.io/fh6gn/>.

DOI: [10.7554/eLife.17044.003](https://doi.org/10.7554/eLife.17044.003)

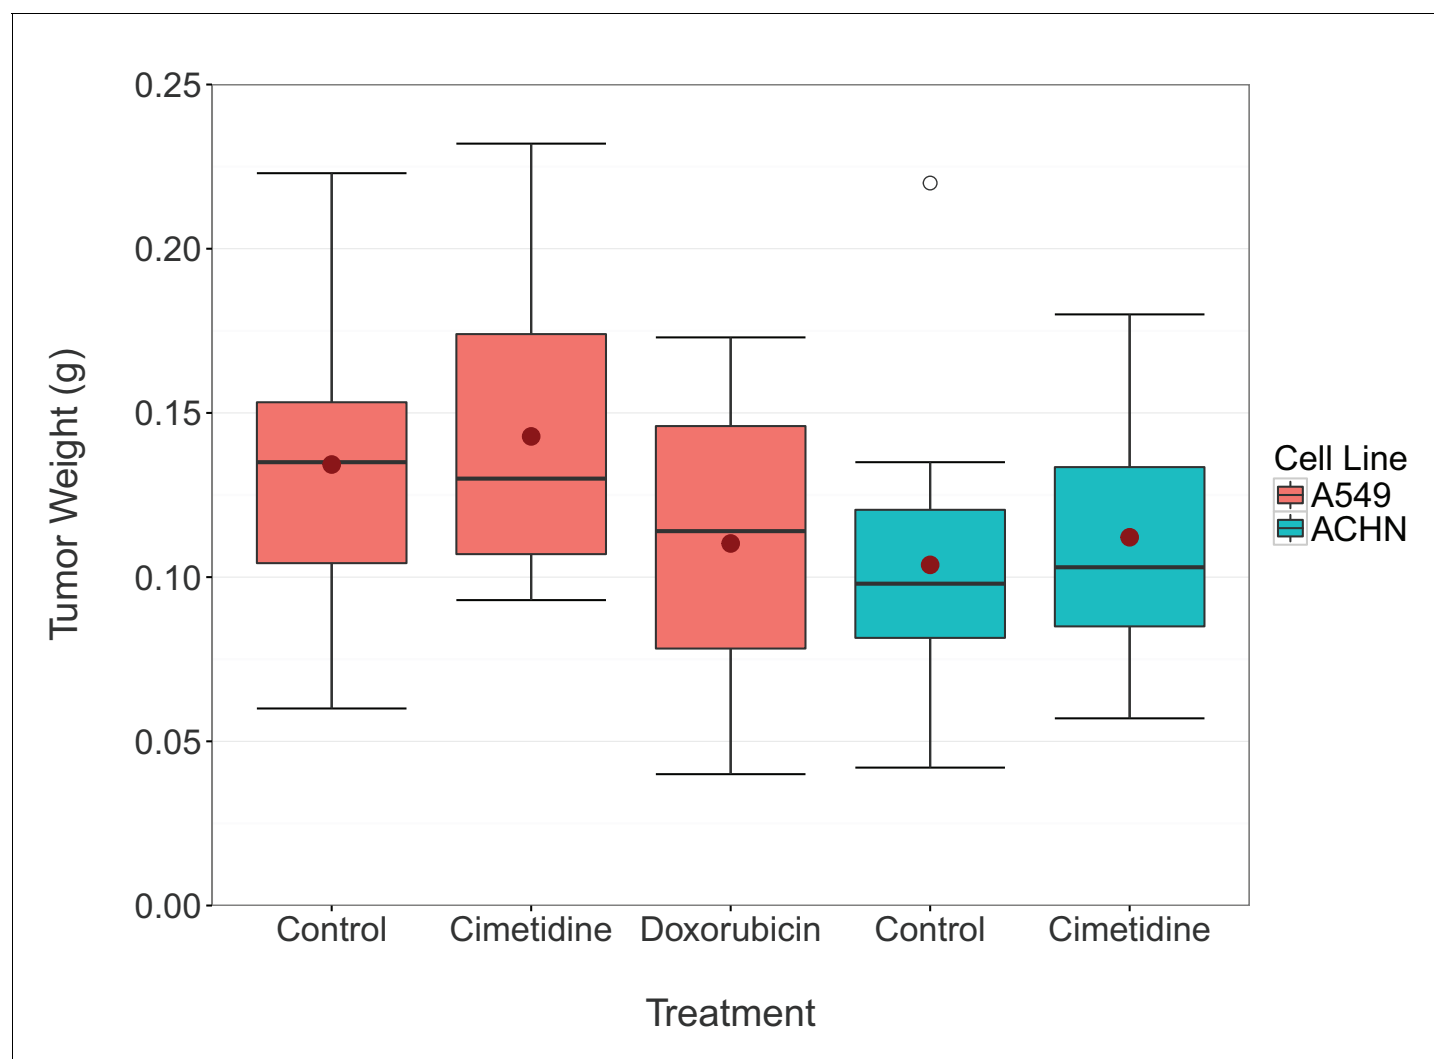

**Figure 2.** Final tumor weights from xenograft experiment testing efficacy of cimetidine in inhibiting the growth of tumors in SCID mice. At the end of the predefined study period (Day 12), tumors from the xenograft experiment reported in **Figure 1** were excised and weighed. Box and whisker plot with median represented as the line through the box, means represented as the solid red circle, and whiskers representing values within 1.5 IQR of the first and third quartile. Number of mice: A549 tumors: n=14 (vehicle), n=13 (cimetidine), n=4 (doxorubicin). ACHN tumors: n=15 (vehicle), n=15 (cimetidine). Two-tailed Welch's t-test between vehicle or doxorubicin treated A549 tumors;  $t(4.078) = 0.771$ ,  $p=0.483$ . Two-way ANOVA interaction between cell line (A549 or ACHN) and treatment (vehicle or cimetidine);  $F(1,53) = 0.00005$ ,  $p=0.994$ . Two-way ANOVA main effect of cell line (A549 or ACHN);  $F(1,53) = 7.56$ ,  $p=0.00814$ . Additional details for this experiment can be found at <https://osf.io/fh6gn/>.

DOI: [10.7554/eLife.17044.004](https://doi.org/10.7554/eLife.17044.004)

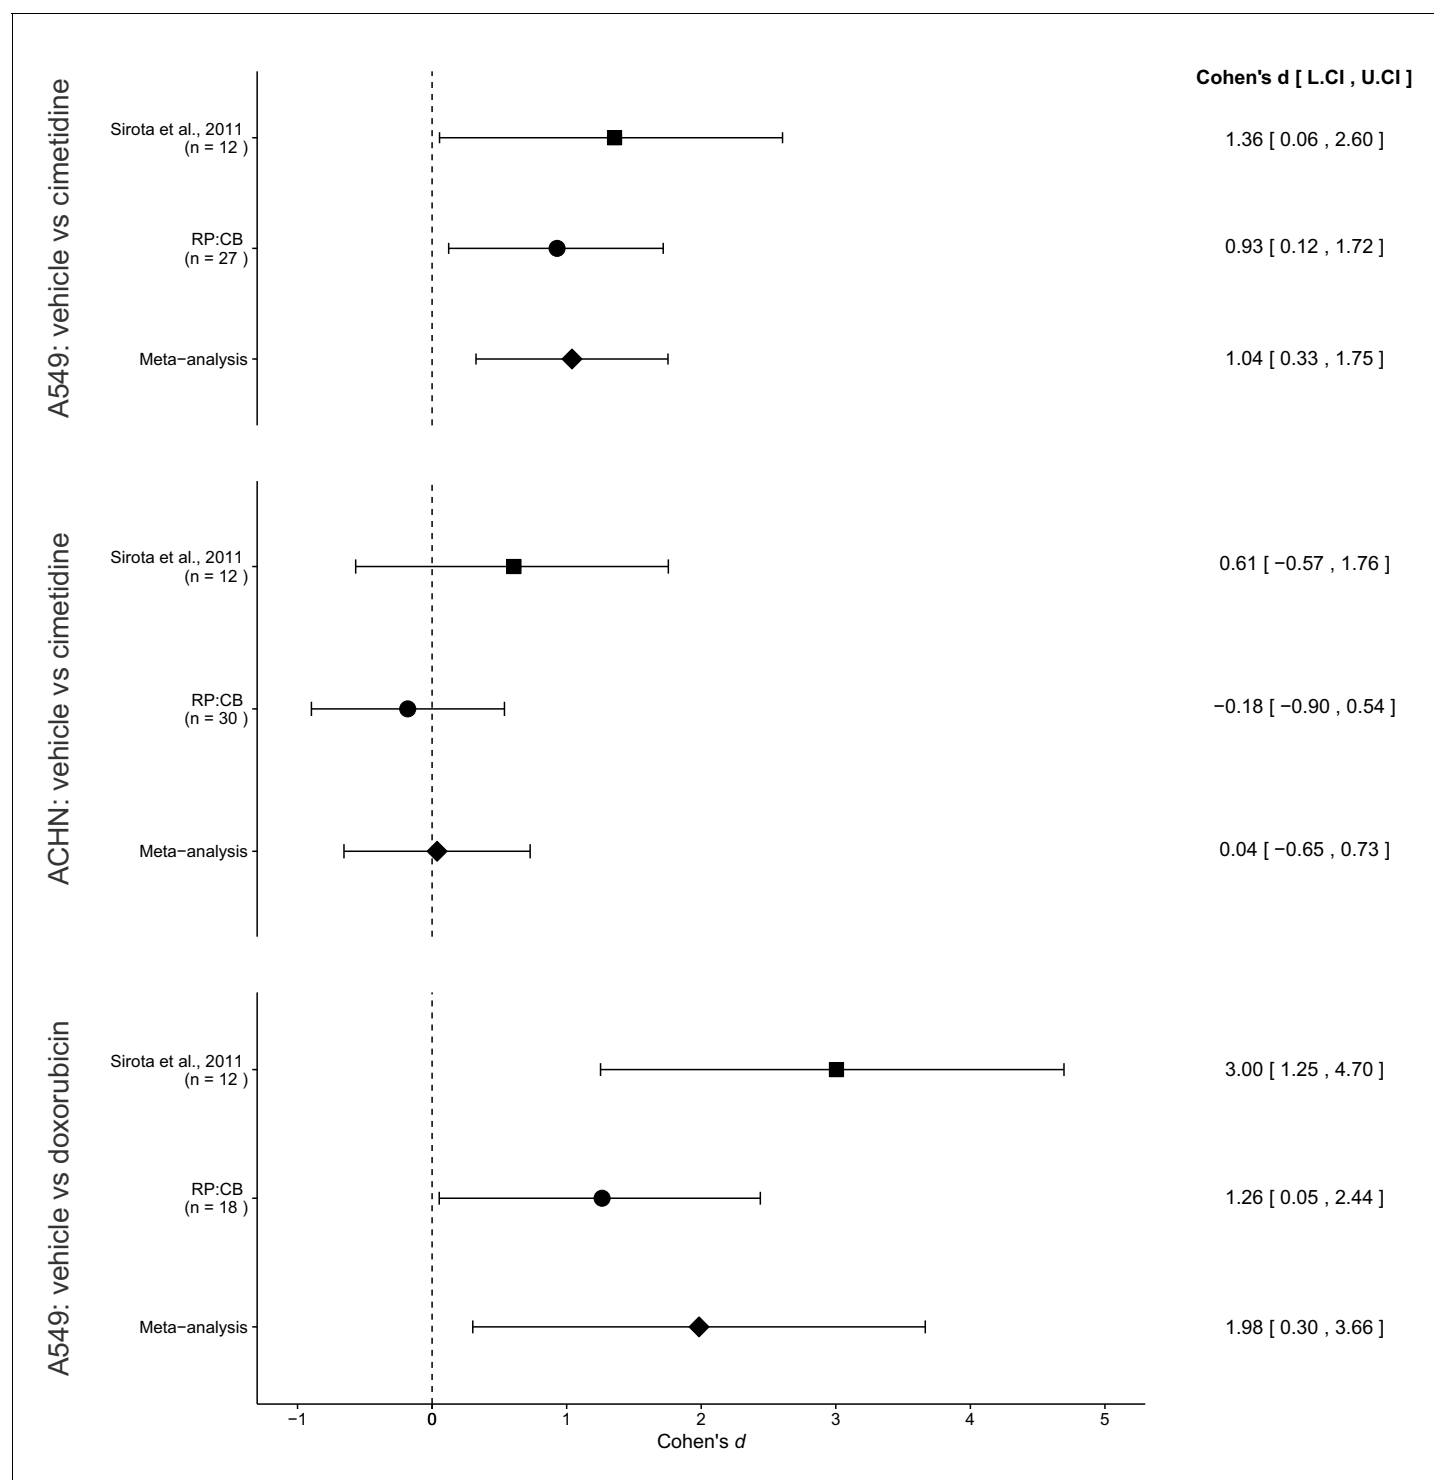

**Figure 3.** Meta-analyses of each effect. Effect size (Cohen's  $d$ ) and 95% confidence interval are presented for *Sirota et al., 2011*, this replication attempt (RP:CB), and a meta-analysis to combine the two effects of day 11 tumor volume comparisons. Sample sizes used in *Sirota et al., 2011* and this replication attempt are reported under the study name. Random effects meta-analysis of A549-derived tumors treated with vehicle (PBS) compared to 100 mg/kg cimetidine (meta-analysis  $p=0.0043$ ), ACHN-derived tumors treated with vehicle (PBS) compared to 100 mg/kg cimetidine (meta-analysis  $p=0.917$ ), and A549-derived tumors treated with vehicle (PBS) compared to 2 mg/kg doxorubicin (meta-analysis  $p=0.021$ ). Additional details for these meta-analyses can be found at <https://osf.io/jcghv/>.

DOI: [10.7554/eLife.17044.005](https://doi.org/10.7554/eLife.17044.005)
